# Supplementary material for: Polymer grafted Janus multi-walled carbon nanotubes
Source: Royal Society of Chemistry journal article supplement (doi:10.1039/b908100c), 2009-01-01
Supplement: b908100c.pdf [file b908100c.pdf]

## Polymer Grafted Janus Multi-Walled Carbon Nanotubes

Dimitrios Priftis,<sup>a</sup> Georgios Sakellariou,<sup>a,\*</sup> Durairaj Baskaran,<sup>b</sup> Jimmy W. Mays<sup>b,c</sup> and Nikos Hadjichristidis.<sup>a,\*</sup>

<sup>a</sup>Department of Chemistry, University of Athens, Athens, Greece.

<sup>b</sup>Department of Chemistry, University of Tennessee, Tennessee, USA

<sup>c</sup>Chemical Sciences Division and Center for Nanophase Materials Sciences, Oak Ridge National Laboratory, Oak Ridge, USA

a)

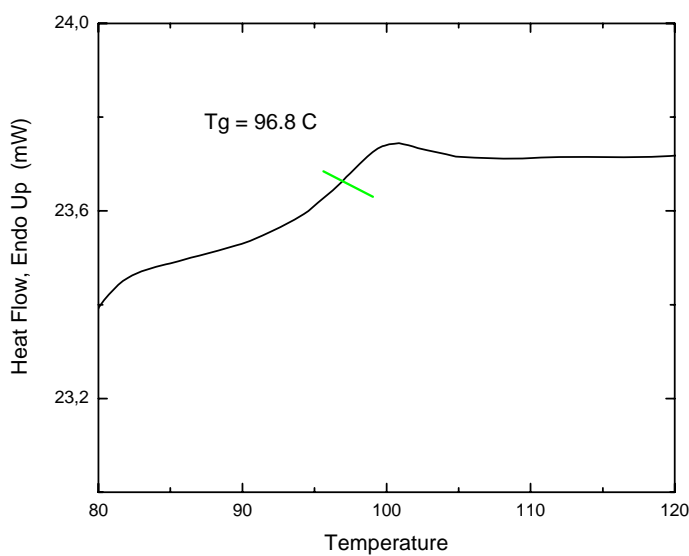

b)

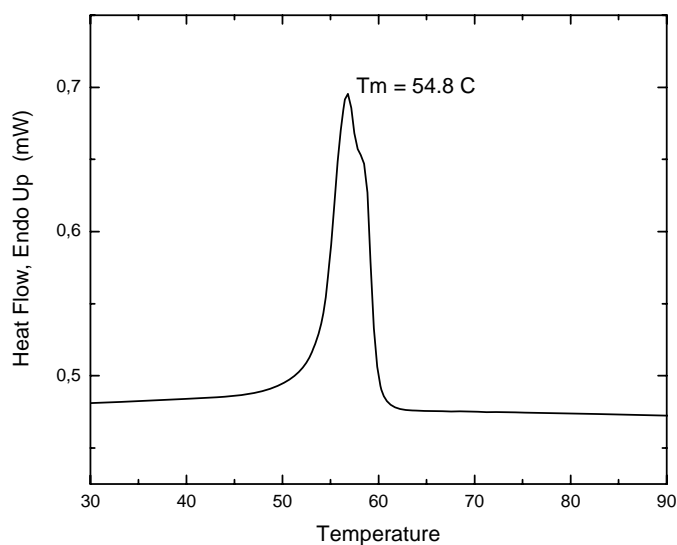

**Figure S1:** a) DSC of neat PS ( $T_g$ ), and b) of neat P $\epsilon$ CL ( $T_m$ ).

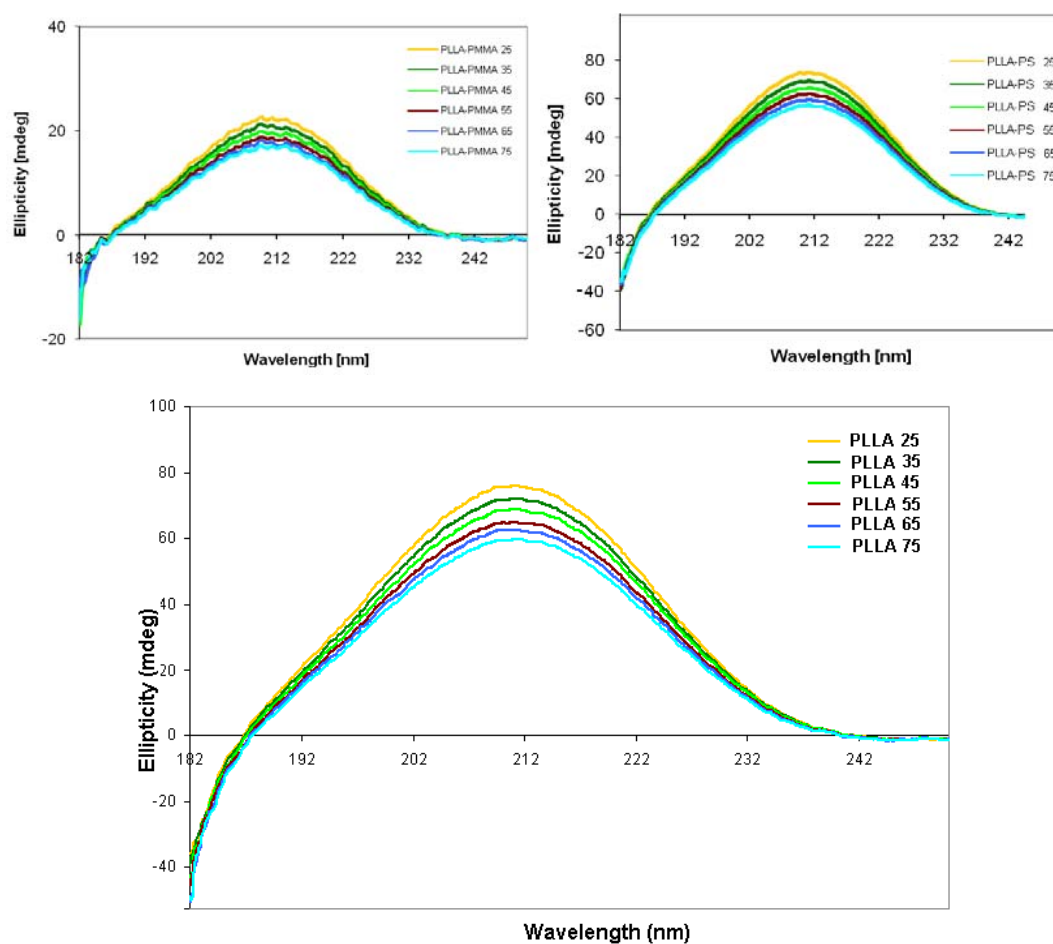

**Figure S2:** Circular dichroism spectra of MWNT-*g*-[(PLLA)<sub>n</sub>(PMMA)<sub>m</sub>] (up left) and MWNT-*g*-[(PLLA)<sub>n</sub>(PS)<sub>m</sub>] (up right), and PLLA (bottom) in acetonitrile at different temperatures (25 to 75 °C).
